# Supplementary material for: Family History in the Iberian Peninsula during Chalcolithic and Bronze Age: An Interpretation through the Genetic Analysis of Plural Burials
Source: MDPI journal article supplement (doi:10.3390/genealogy8010025), 2024-03-06
Supplement: s1 [file s1]

| STAFF           | MITOCHONDRIAL DNA                         |                                          | AUTOSOMAL STRs |          |        |        |          |       |       |          |        |       |         |          |        |        |         |
|-----------------|-------------------------------------------|------------------------------------------|----------------|----------|--------|--------|----------|-------|-------|----------|--------|-------|---------|----------|--------|--------|---------|
|                 | HVA                                       | HVR                                      | D8S1179        | D21S11** | D7S820 | CSF1PO | D19S433  | VWA   | TPCK  | D18S51   | D5S818 | FGA*  | D3S1358 | TH01     | D19S17 | D16S59 | D2S1338 |
| Researcher 1    | 16363C                                    | 56D 150T 239C 263G 309-1C 309-2C 315-1C  | 12/13          | 28/32    | 9/10   | 11     | 13/14    | 15/17 | 8/11  | 12/14    | 11/12  | 22/26 | 15      | 9/3      | 11/12  | 11/12  | 23      |
| Researcher 2    | 16218T 16128A 16380C                      | 24864A 2680A 293C 315-3C                 | 12/13          | 29/29    | 9/11   | 10/11  | 13/15    | 16/17 | 8     | 14/20    | 9/12   | 19/23 | 17/18   | 6/9      | 9      | 9/14   | 16/17   |
| Researcher 3    | 16095T 16129C                             | 186A 189T 205A 263G 309-1C 309-2C 315-1C | 12/13          | 27/29    | 10/11  | 10/11  | 13/15    | 16/17 | 8     | 13/17/19 | 10/12  | 16/18 | 9       | 11/12/13 | 9/11   | 20/21  | 16/17   |
| Researcher 4    | 16129C 16294T 16294T 16309C               | 263G 315-1C                              | 13/13          | 31/32    | 9/11   | 12     | 13/15    | 17/18 | 8/11  | 12       | 11     | 21/22 | 16      | 7/8      | 9/11   | 11/12  | 17/24   |
| Researcher 5    | 16224C 16311C                             | 146C 153C 263G 315-1C                    | 13/13          | 30/32    | 9/11   | 30     | 14/15/12 | 17    | 8     | 12       | 11/12  | 24/25 | 14/17   | 7/8      | 8/11   | 9/11   | 23      |
| Researcher 6    | ORS                                       | 72C 191C 198T 263G 309-1C 315-3C         | 13/13          | 30/31.2  | 8/10   | 11/12  | 14       | 14/16 | 8     | 12/16    | 12/13  | 21/21 | 14/16   | 6        | 8/12   | 13     | 20/23   |
| Archaeologist 1 | ORS                                       | 158R 263G 315-1C                         | 15/16          | 26/30    | 10/11  | 10/11  | 13       | 18    | 8/11  | 17/18    | 9/10   | 23/25 | 17/18   | 9/9,3    | 12/13  | 12/13  | 19/24   |
| Archaeologist 2 | 16145A 16172C 16222T 16261T 16305T        | 73G 199T/C 242T 263G 295T 309-1C 315-1C  | 13             | 27/29    | 9/12   | 10/12  | 13/15    | 14/16 | 8     | 14       | 9/12   | 19/21 | 16/17   | 6/9      | 12/13  | 10/12  | 17/25   |
| Archaeologist 3 | ORS                                       |                                          | 13             | 32.2     | 10/12  | 30     | 14       | 15    | 8/10  | 12/19    | 11/12  | 21/22 | 13/18   | 7/9,3    | 8/11   | 11/13  | 17      |
| Archaeologist 4 | 16223T 16277R 16311C 16362C 16392C        |                                          | 10/13          | 29/31.2  | 8/12   | 10/12  | 15,21/16 | 17/18 | 8/11  | 16/17    | 11     | 19/24 | 16/17   | 7/9      | 12     | 9/10   | 18/23   |
| Other 1         | ORS                                       |                                          | 10/13          | 29/31    | 10/11  | 10/11  | 12/14    | 14/16 | 8/9   | 12/15    | 12/13  | 22/25 | 14/16   | 12       | 12     | 12     | 19/23   |
| Other 2         | 16362C                                    |                                          | 15/15          | 28/30    | 9/12   | 30     | 14/15    | 11/18 | 8     | 14/17    | 12/13  | 22/24 | 17/18   | 6/9      | 11/13  | 11/12  | 17/24   |
| Other 4         | 16189C 16192T 16270T 16293C 16311C 16389A |                                          | 10/13          | 32.2     | 8/10   | 11     | 14/15.2  | 15/16 | 9/11  | 13/17    | 11/13  | 21/23 | 15/18   | 9/9,3    | 11/13  | 12     | 18/20   |
| Other 5         | 16293T 16298C                             |                                          | 11/13          | 28/32.2  | 10/11  | 10/12  | 13       | 15/16 | 9/11  | 17       | 11/12  | 22/23 | 16/17   | 9,3      | 11/12  | 11/12  | 22/24   |
| Other 6         | 16209C 16294T                             |                                          | 11/15          | 29       | 10/11  | 11/12  | 13/14    | 17/18 | 11/12 | 15/16    | 15/14  | 20/24 | 13/18   | 9        | 11/14  | 12/13  | 17/23   |
| Other 7         | ORS                                       |                                          | 10/13          | 28/32    | 7/10   | 11/12  | 12/14    | 16/19 | 8     | 13/21    | 11/12  | 25    | 14/18   | 9/9,3    | 11/12  | 9/11   | 18/20   |
| Other 8         | 16311C 16380C                             | 239C 263G 315-1C                         | 11             | 29/32.2  | 10/11  | 10/11  | 13/14    | 14/16 | 8/9   | 12/13    | 12     | 23/24 | 18/19   | 6/9,3    | 11     | 13     | 16/18   |
| Other 9         | 16126A 16164A 16223T 16391A               | 239C 159C 194C 207A 263G 309-1C 315-1C   | 12/15          | 30       | 11/12  | 11/13  | 13/14    | 14/16 | 8/9   | 12/18    | 12     | 20/21 | 18/18   | 6/9,3    | 12     | 11/13  | 17      |
| Other 10        | 16311C 16380C                             | 263G 309-1C 315-1C                       | 30             | 30       | 9      | 10/12  | 13/14    | 16/19 | 8/9   | 16/17    | 11/12  | 25/26 | 15/16   | 9/9,3    | 33/34  | 11/12  | 39/24   |
| Other 11        | 16148C                                    | 73G 146C 263G 309-1C 315-1C              |                |          |        |        |          |       |       |          |        |       |         |          |        |        |         |
| Other 12        | 16185T 16222T 16311C 16327T               | 73G 150T 185A 189G 200G 263G 315-1C      |                |          |        |        |          |       |       |          |        |       |         |          |        |        |         |
